# Supplementary material for: Measurement Report: Cloud and environmental properties associated with aggregated shallow marine cumulus and cumulus congestus
Source: Copernicus journal article supplement (doi:10.5194/egusphere-2024-148), 2024-01-26
Supplement: Supplementary file 1 [file egusphere-2024-148-supplement.pdf]

*Supplement of:*

**Measurement Report: Cloud and environmental properties associated with aggregated shallow marine cumulus and cumulus congestus**

Ewan Crosbie et al.

*Correspondence to:* Ewan Crosbie ([ewan.c.crosbie@nasa.gov](mailto:ewan.c.crosbie@nasa.gov))

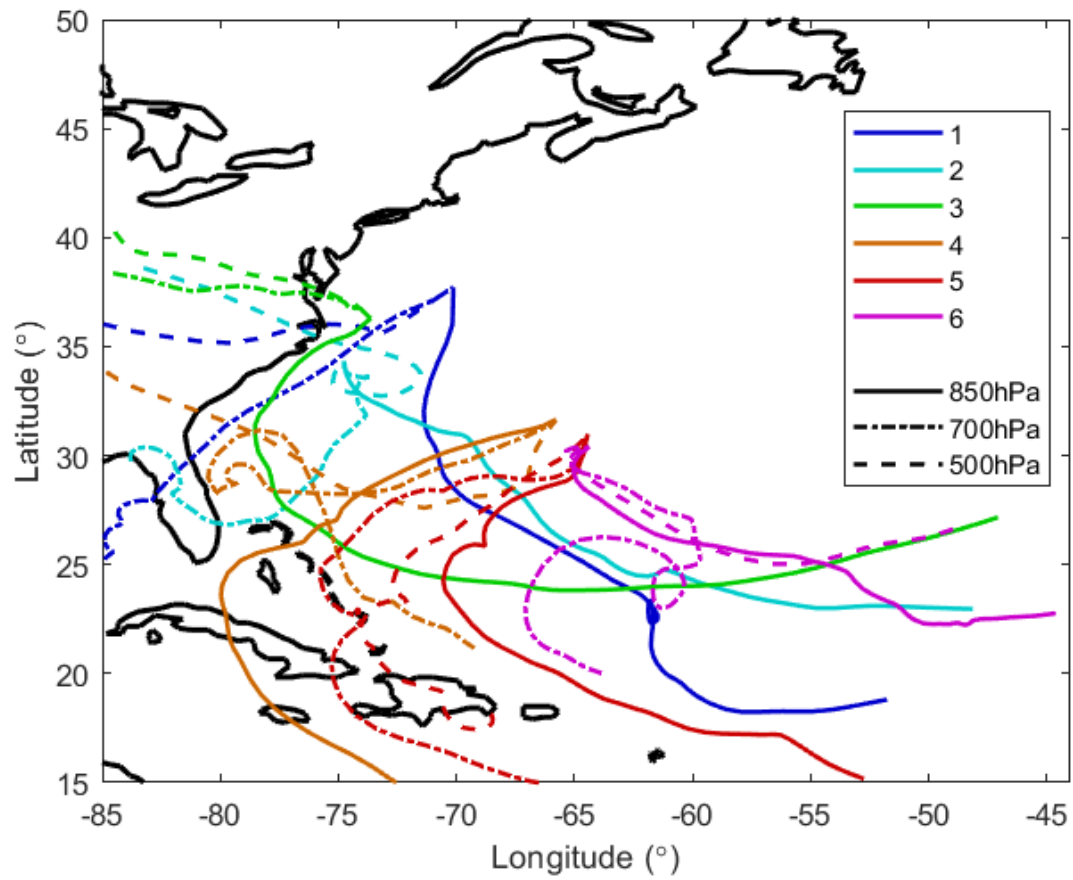

Figure S1: 8-day back trajectories using MERRA-2 3-dimensional wind fields terminating at 850, 700, and 500 hPa, for Cases 1-6. Unlike the layer-averaged horizontal trajectories shown in Figure 2 of the main text, these trajectories incorporate the prognosed large scale vertical advection.

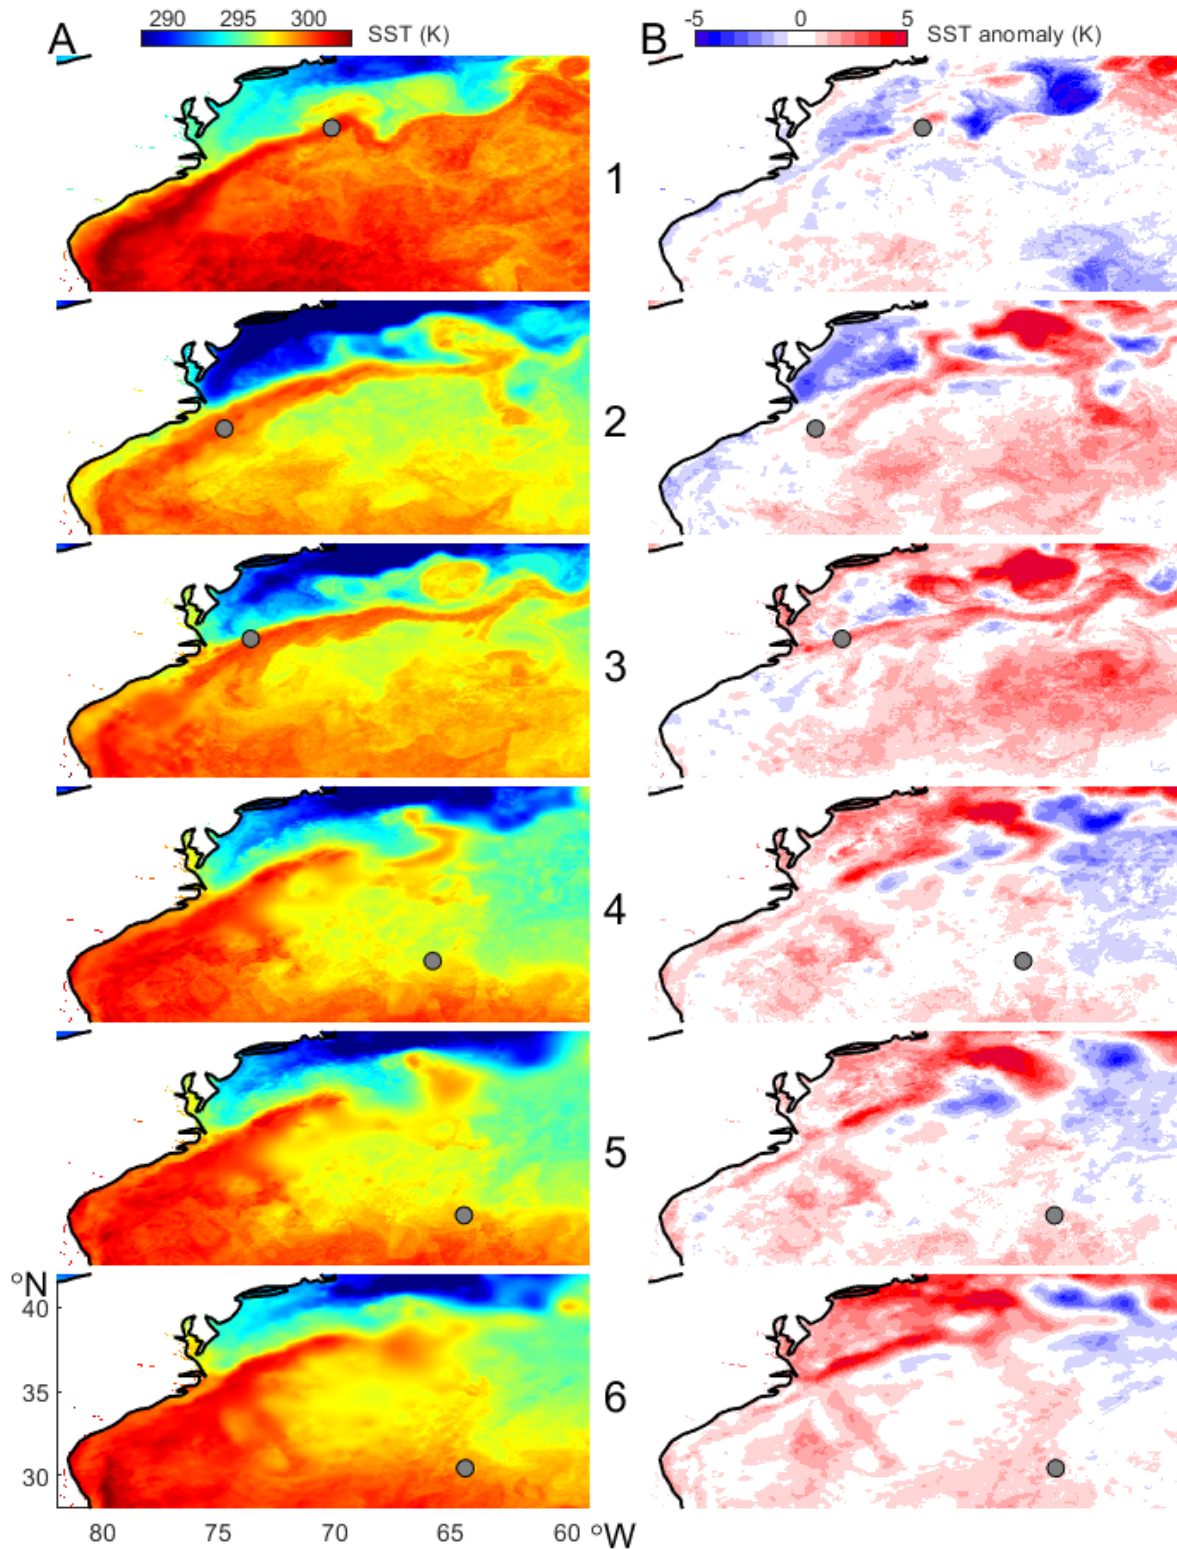

Figure S2: Shown for each case: (A) Sea surface temperature, and (B) sea surface temperature anomalies from climatology. The marker indicates the location of each case study.

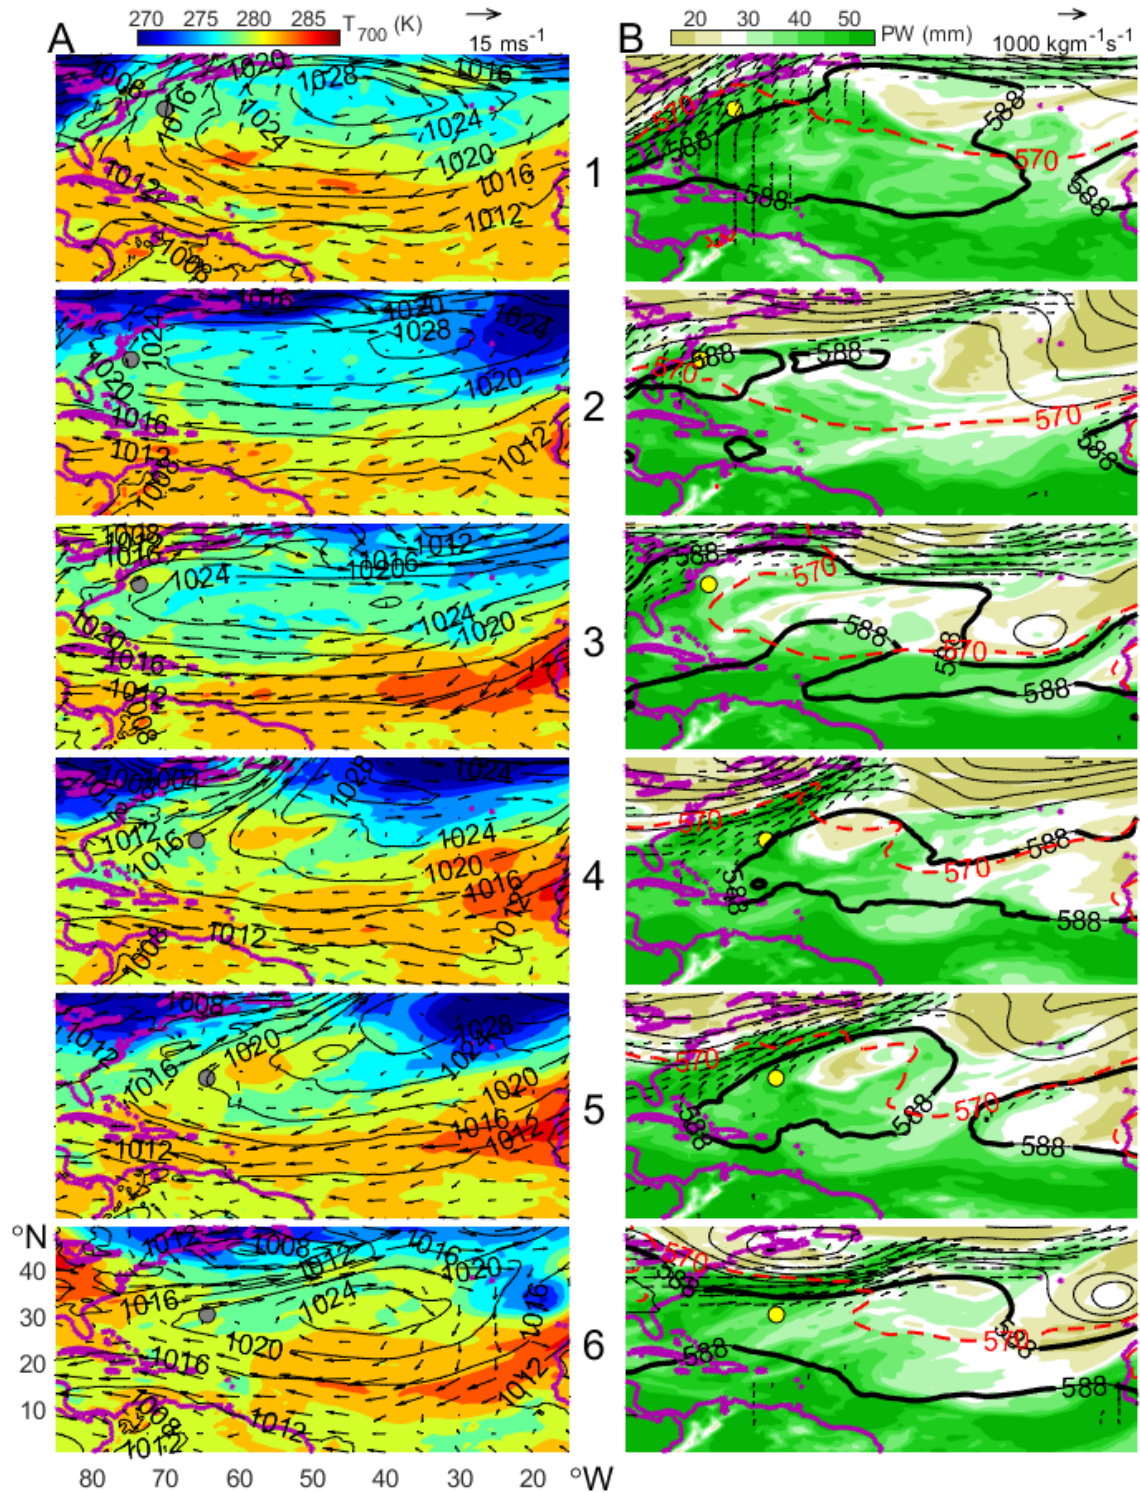

Figure S3: Shown for each case: (A) Sea-level pressure (contours), 850 hPa wind vectors, and 700 hPa temperature (colored). (B) 500 hPa geopotential height (contours at 6 dm intervals, thick contour designates the 588 dm level), 570 dm 1000-500 hPa thickness contour delineating the warm lower troposphere of the tropics, precipitable water (colored), and column moisture flux (vectors).

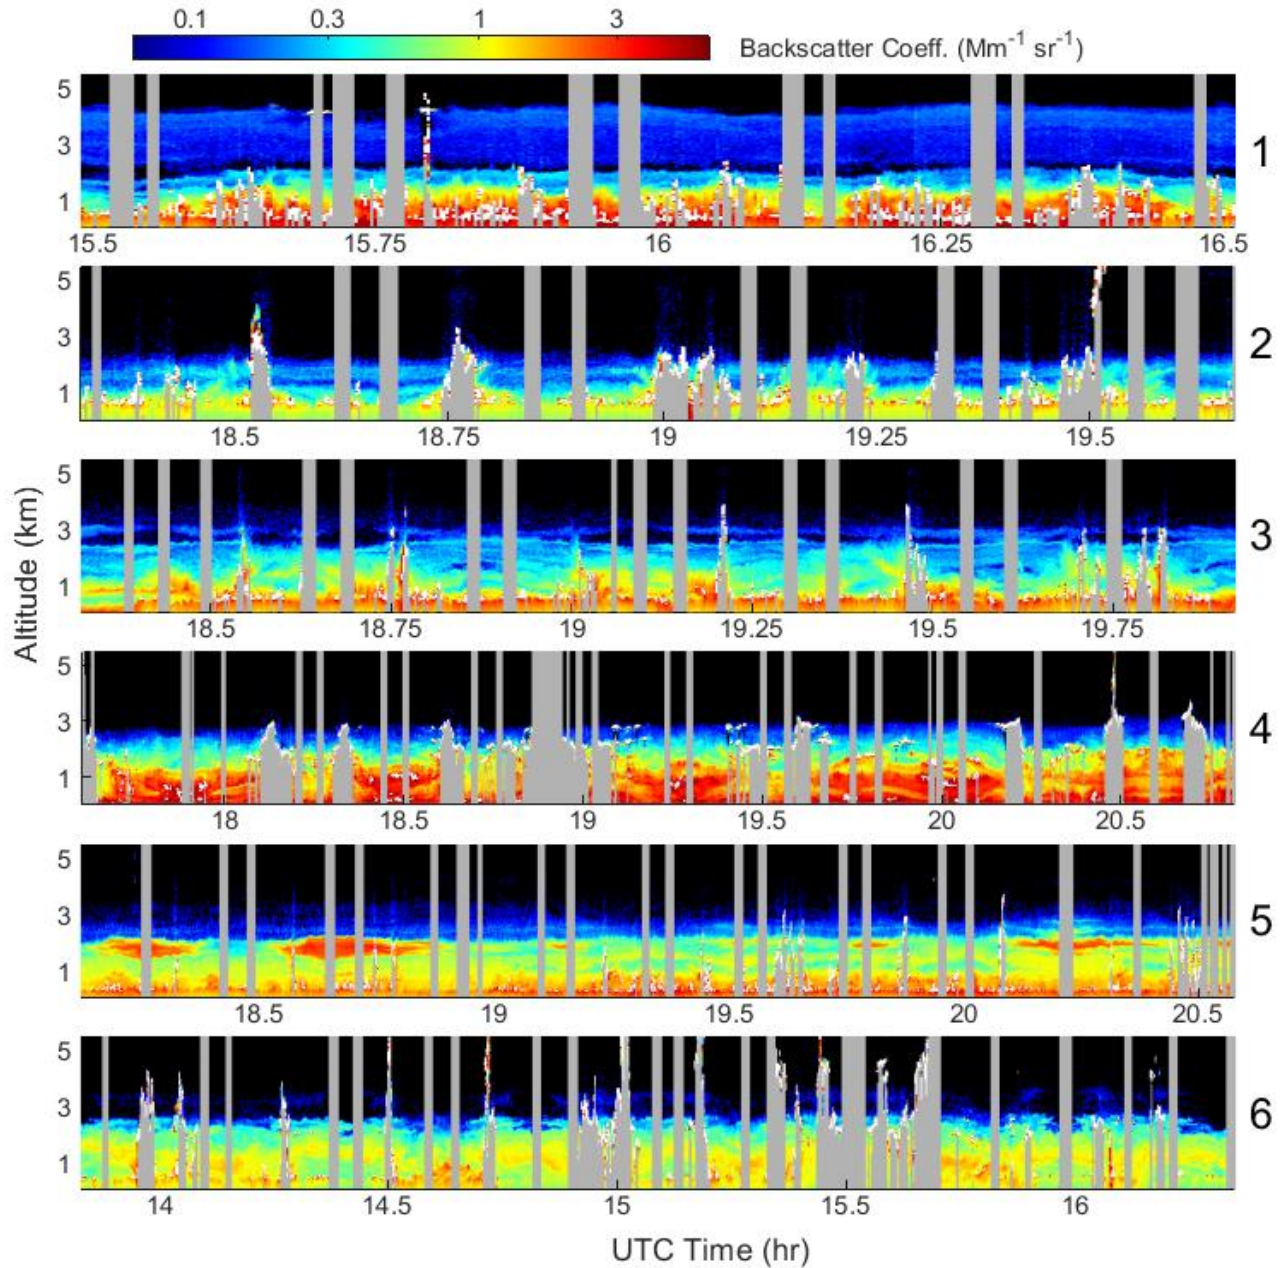

Figure S4: Backscatter coefficient timeseries from HSRL-2 during the King Air module for each case. White and grey shading indicate cloud and data removed because of aircraft turns or attenuation by clouds, respectively.
